# Supplementary material for: Presentation and Outcomes of Childhood Cancer Patients at Uganda Cancer Institute
Source: PubMed Central journal article supplement — Glob Pediatr Health. 2019 May 18;6:2333794X19849749. doi: 10.1177/2333794X19849749 (PMC6537233; doi:10.1177/2333794x19849749), 2019-05-18
Supplement: Supplementary_Table_4.pdf [file Supplementary_Table_4.pdf]

**Table 4. Comparison of patients enumerated in the Kampala Cancer Registry to Patients at UCI, 2006 - 2009.**

| <b>Characteristics</b>          | <b>In KCR but missing at UCI (420)</b> | <b>At UCI (310)</b> | <b>P-value</b> |
|---------------------------------|----------------------------------------|---------------------|----------------|
| <b>Sex</b>                      |                                        |                     |                |
| Female, n (%)                   | 212 (50.5)                             | 110(35.5)           | <0.001         |
| <b>Age, years, med (IQR)</b>    | 10(5-15)                               | 7(4-11))            | 0.01           |
| <b>Year of diagnosis</b>        |                                        |                     |                |
| 2006                            | 130(31)                                | 69(22.3)            | 0.02           |
| 2007                            | 106(25.2)                              | 85(27.4)            |                |
| 2008                            | 107(25.5)                              | 62(20.0)            |                |
| 2009                            | 77(18.3)                               | 94(30.3)            |                |
| <b>Basis of diagnosis, n(%)</b> |                                        |                     |                |
| Histology                       | 238(56.8)                              | 286(92.3)           | <0.001         |
| Clinical diagnosis              | 168(40.1)                              | 24(7.7)             |                |

KCR, Kampala Cancer Registry; UCI, Uganda Cancer Institute
